# Supplementary material for: Do We Need to Design Course-Based Undergraduate Research Experiences for Authenticity?
Source: PubMed Central journal article supplement — CBE Life Sci Educ. 2016 Winter;15(4):ar79. doi: 10.1187/cbe.16-02-0102 (PMC5132376; doi:10.1187/cbe.16-02-0102), 2016
Supplement: supp_15.4.ar79_CombinedSupMats.pdf [file supp_15.4.ar79_CombinedSupMats.pdf]

# Supplemental Material

*CBE—Life Sciences Education*

Rowland *et al.*

**Table S1: Short-Answer Post-Survey Items used in Coding.** Items appear as shown in the survey.

| Survey Item | Full Description                                                                                                                                                                                                                                                             |
|-------------|------------------------------------------------------------------------------------------------------------------------------------------------------------------------------------------------------------------------------------------------------------------------------|
| Roses       | What are the positives of your LEAPS or ALLURE experience? Why?                                                                                                                                                                                                              |
| Thorns      | Was there something that could be changed or something you didn't like about your LEAPS or ALLURE experience? Why?                                                                                                                                                           |
| Buds        | Has the LEAPS or ALLURE experience had any effect on you personally?<br>For example, has it changed your interest in pursuing science in the future? Has it changed your outlook on your future career? In this section you can write about emergent possibilities or ideas. |

**Table S2:** Coding Framework Adapted from Hunter et al. (2007). The parent and sub/child-categories appear as in the original source, with the hierarchy determined by the two coders (J.P.L.T and Y.H). Note: non-coloured child categories/nodes are those which contain the sub-coding for positive/negative/neutral statements. Within each sub-node, the coders organised statements from ALURE and LEAPS students as positive, negative, or neutral.

|                                                                                                                              |
|------------------------------------------------------------------------------------------------------------------------------|
| <b>Parent Category, Sub-categories, and Nodes</b>                                                                            |
| <b>Thinking and working like a scientist</b>                                                                                 |
| <i>Application of knowledge and skills</i>                                                                                   |
| Understanding how to approach research problems and design                                                                   |
| Understanding science research through hands on experience                                                                   |
| Understanding the nature of scientific knowledge                                                                             |
| <i>Increased knowledge and understanding of science and research work</i>                                                    |
| Connections between and within sciences                                                                                      |
| Increased relevance of coursework                                                                                            |
| Theory and concepts                                                                                                          |
| Transfer between research and courses                                                                                        |
| <b>Becoming a scientist</b>                                                                                                  |
| <i>Demonstrated gains in behaviours and attitudes necessary to becoming a researcher</i>                                     |
| Creative and independent approach in decision making                                                                         |
| Intellectual engagement, initiative                                                                                          |
| Student takes 'ownership' of project and shows responsibility                                                                |
| Greater understanding of the nature of research work and professional practice                                               |
| Identification with and bonding with science                                                                                 |
| <b>Personal-professional</b>                                                                                                 |
| Establishing collegial, working relationships with faculty advisors                                                          |
| Establishing collegial, working relationships with peers <sup>1</sup>                                                        |
| Increased confidence in ability to do research, contribute to science, present or defend work, in 'feeling like a scientist' |
| <b>Clarification, confirmation, and refinement of career and education paths</b>                                             |
| Clarification of which field to study                                                                                        |
| Greater knowledge of career and education options                                                                            |
| Increased interest and enthusiasm for field                                                                                  |
| Introduced to new field of study                                                                                             |
| Validation of disciplinary interests and clarification of graduate school intentions                                         |
| <b>Enhanced career and graduate school preparation</b>                                                                       |
| Good graduate school and job preparation                                                                                     |
| New professional experiences                                                                                                 |
| Opportunities for collaboration and networking with faculty, peers, other scientists                                         |
| Real-world work experience                                                                                                   |
| Resume enhanced                                                                                                              |
| <b>Skills</b>                                                                                                                |
| Communication skills                                                                                                         |
| Computer                                                                                                                     |
| Information retrieval                                                                                                        |
| Laboratory and field techniques                                                                                              |
| Presentation and oral argument                                                                                               |
| Reading comprehension                                                                                                        |
| Work organisation                                                                                                            |
| Working collaboratively                                                                                                      |
| Writing and editing                                                                                                          |
| <b>Generalised and other gains</b>                                                                                           |
| Access to good laboratory equipment                                                                                          |
| Good summer job                                                                                                              |
| Students learn a lot                                                                                                         |
| <b>Working independently</b>                                                                                                 |

1. This and the previous node appear as one in the original source; it was split into two for the coding framework.

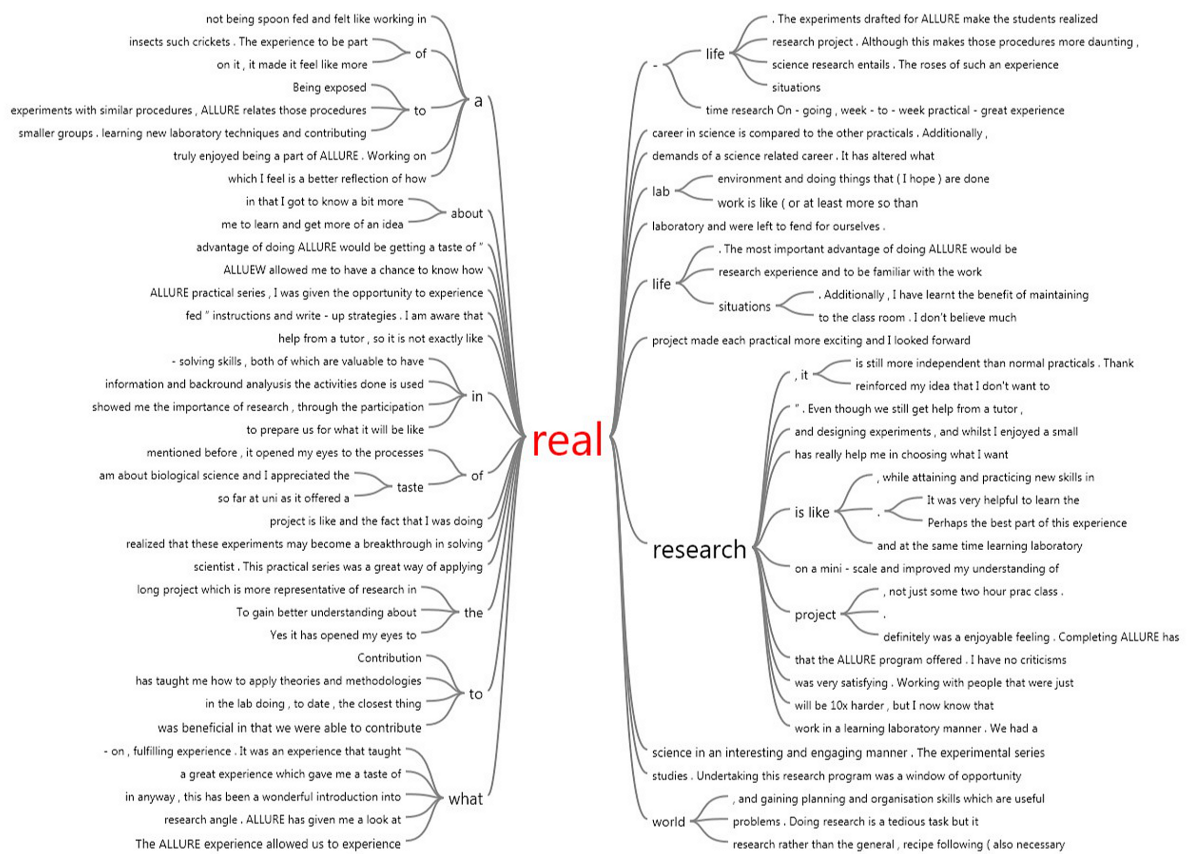

**Figure S1: ALURE Word Tree: “Real”.** The figure shows 41 references or instances of the word ‘real’ in all positively coded ALURE reflections (n = 94). The context words on either side of the search word (in red) were lengthened to 10 words on either side of the word. The references are displayed in alphabetical order on each side, and therefore cannot be read from left-to-right to form a sentence or phrase.

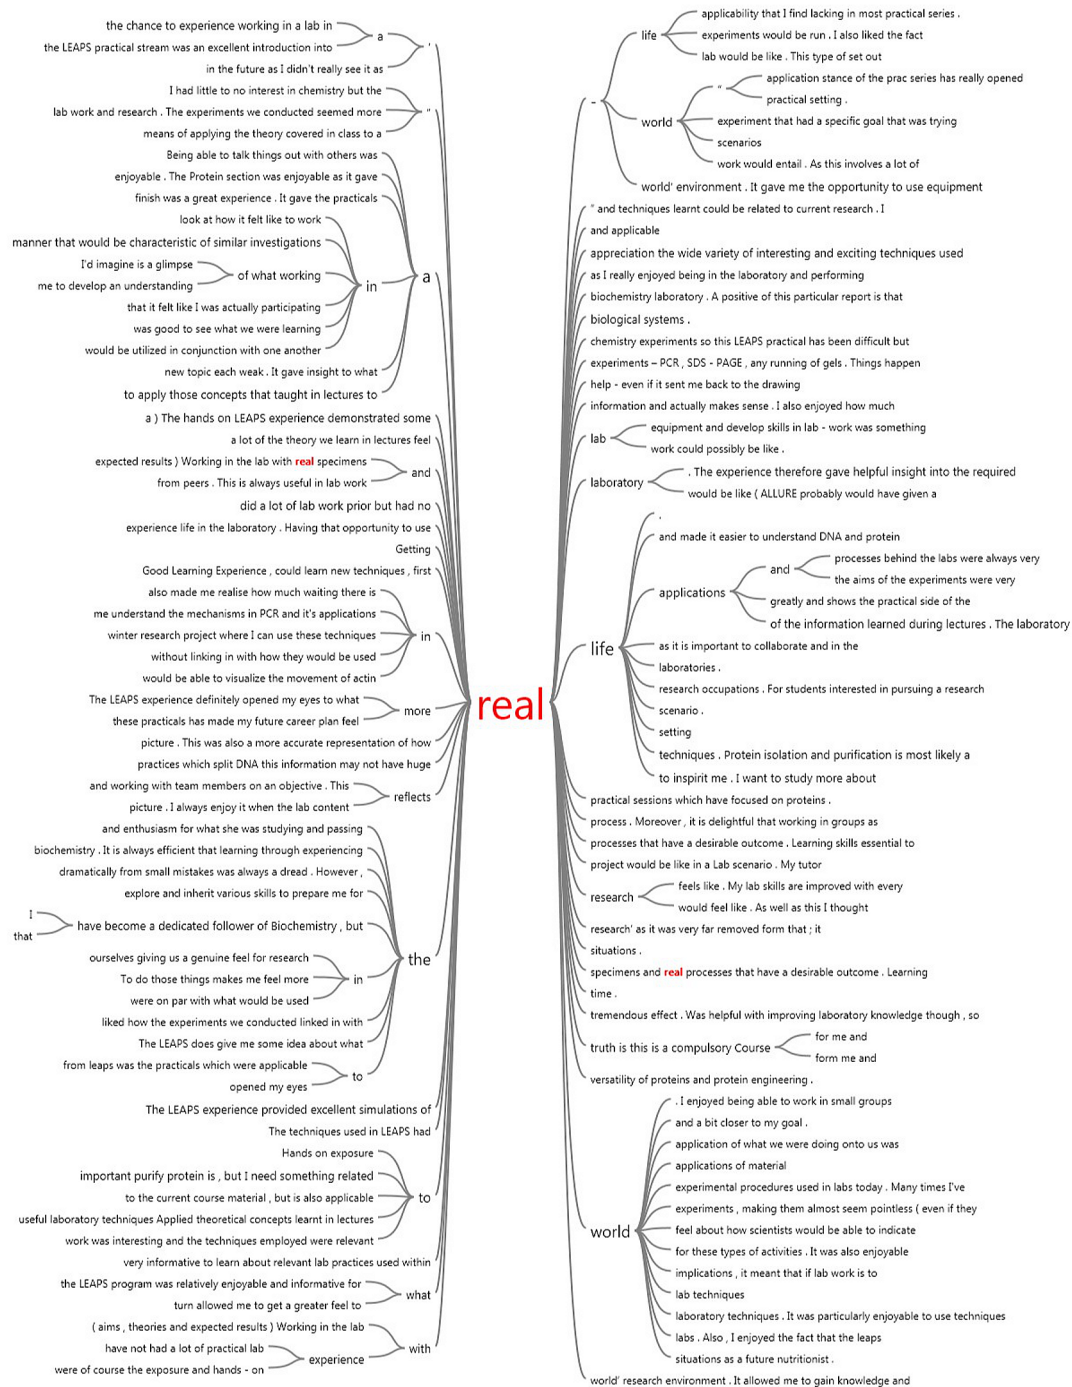

**Figure S2: LEAPS Word Tree: “Real”.** The figure shows 71 references or instances of the word ‘real’ in all positively coded LEAPS reflections (n = 510). The context words on either side of the search word (in red) were lengthened to 10 words on either side of the search word. The references are displayed in alphabetical order on each side, and therefore cannot be read from left-to-right to form a sentence or phrase.
